# Supplementary material
Source: HighWire-hosted journal article supplement (https://www.life-science-alliance.org/content/5/2/e202101278)

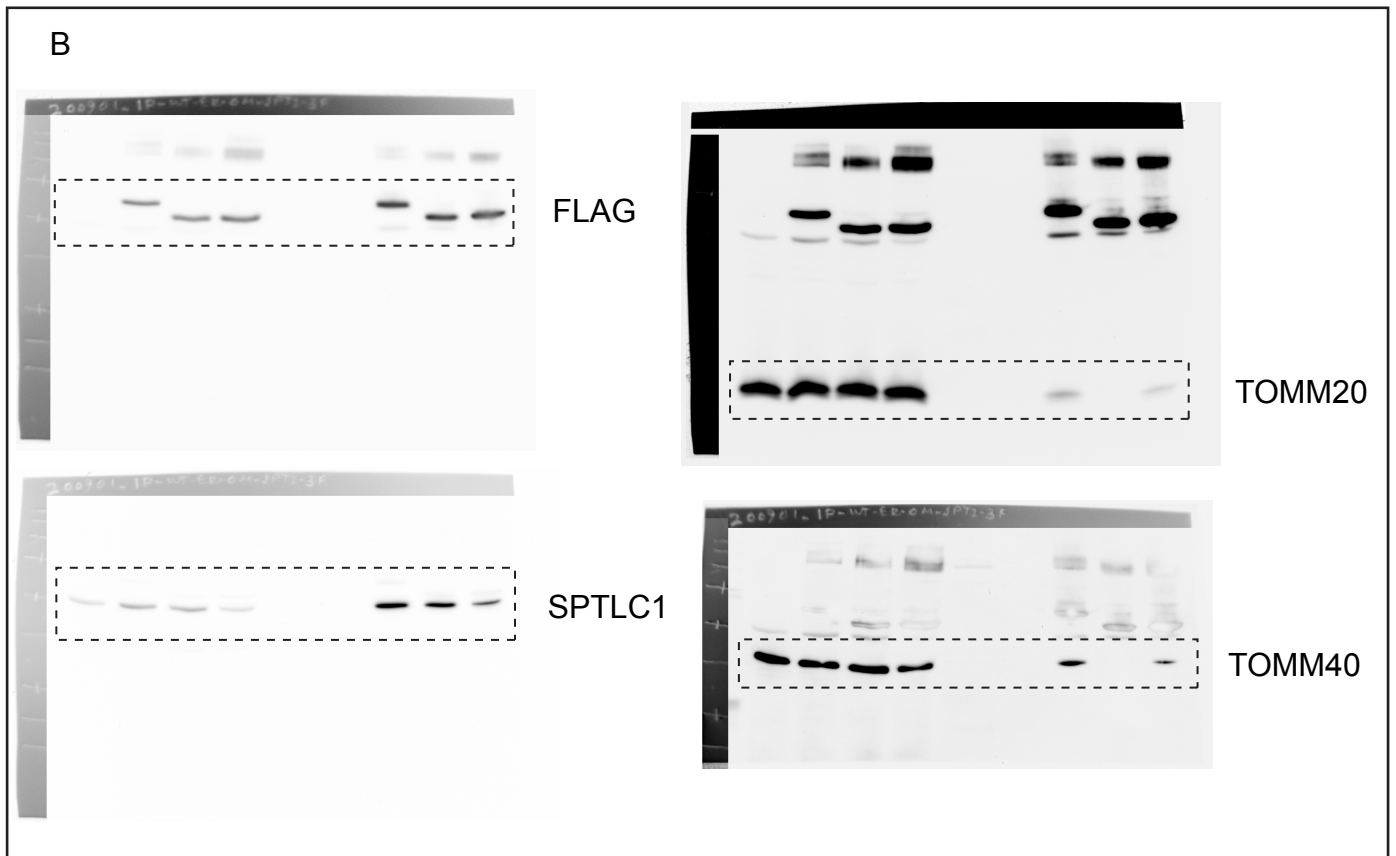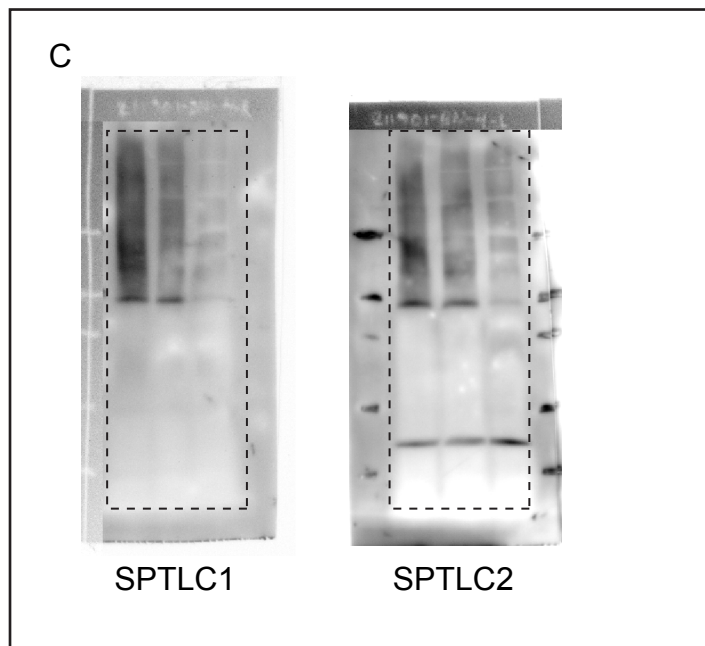

Supplement: inline-supplementary-material-5 [file inline-supplementary-material-5.pdf]
